# Supplementary material for: Factors associated with single-family home survival in the 2018 Camp Fire, California
Source: Research Square preprint supplement (doi:10.21203/rs.3.rs-580864/v1), 2021-06-21
Supplement: Supplementary file 1 [file ea5d203cdf6110bc6e291d17.csv]

APN	Outcome	Yr_Built	Time	LotSize	DD_E2E_Home	DD_E2E_AnyS	D_E2E_Home	D_E2E_AnyS	TotalStruct_100m	StructD_100m	CC_0to30	CC_30to100	Landuse	Slope	Notes
050-180-050-000	D	2011	3	0.342592877	19	19	19	19	8	6	20	65	intermix	6.7
053-250-123-000	D	2015	3	0.204437879	9	8	9	8	12	9	15	50	intermix	3.6
055-190-062-000	S	2017	3	0.847919061	150	107	50	50	1	0	15	20	intermix	6.1
052-122-034-000	D	2016	3	0.150442736	15	15	15	15	20	17	50	35	interface	5.1
051-220-101-000	S	2018	3	0.15633104	12	12	12	12	7	4	15	30	intermix	4.6
053-180-174-000	D	2014	3	0.606471469	38	38	38	38	4	4	0	25	intermix	0.9
053-170-041-000	D	2009	3	0.245159854	29	29	29	29	10	9	65	55	intermix	4.7
051-260-044-000	D	2012	3	0.132656414	2	2	2	2	10	9	30	40	interface	2.1
050-090-051-000	D	2009	3	1.872827195	38	38	38	38	5	5	65	80	intermix	4.8
055-470-005-000	D	2017	3	0.424723998	13	13	13	13	6	6	45	40	intermix	8
055-470-004-000	D	2017	3	0.33533711	5	5	5	5	10	9	30	40	intermix	6.8
051-145-007-000	S	2010	3	0.18360947	14	14	14	6	16	14	35	60	intermix	5.7
053-180-167-000	D	2014	3	0.231407123	10	10	10	10	10	9	30	50	intermix	1
050-190-043-000	D	2008	3	0.146201943	25	25	25	25	9	7	70	60	interface	1.2
052-182-002-000	D	2018	3	0.659360987	24	24	24	24	9	9	55	40	intermix	9.9
055-220-043-000	S	2009	3	0.97466896	77	77	77	77	1	1	10	20	intermix	6.3
051-250-081-000	S	2008	3	0.199486038	20	20	11	11	8	6	15	35	intermix	4.7
055-080-048-000	S	2013	3	0.784956293	32	26	32	8	2	1	20	15	intermix	8.9
055-170-036-000	S	2016	3	1.357977742	151	151	69	69	2	0	5	35	intermix	8.9
051-210-051-000	S	2017	3	0.939315662	138	138	11	11	5	0	5	10	intermix	14
055-050-095-000	S	2014	3	0.187737758	19	18	19	18	9	8	35	15	intermix	2.5
051-480-026-000	S	2015	3	0.264776204	53	53	19	19	7	2	20	30	intermix	2.9
051-220-102-000	D	2017	3	0.123818697	9	9	9	9	8	6	5	35	intermix	4.8
054-202-045-000	D	2008	3	0.228109268	11	11	11	11	5	3	20	60	intermix	10.2
053-170-202-000	S	2008	3	0.204147713	18	18	18	18	10	7	20	40	intermix	2.9
053-210-012-000	D	2008	3	0.151028329	15	10	15	8	15	14	35	60	intermix	8.1
051-460-027-000	S	2017	3	0.269414002	16	16	16	16	5	4	15	15	intermix	6.1
053-180-170-000	D	2015	3	0.216646702	11	11	11	11	8	6	5	30	intermix	5.6
051-320-017-000	D	2017	3	0.152290975	17	17	17	17	8	8	70	60	intermix	1.2
051-072-085-000	D	2017	3	0.446971267	24	24	24	24	3	2	15	65	intermix	4.1
055-050-092-000	D	2015	3	0.27127762	13	5	13	5	10	8	10	20	intermix	3.7
055-280-013-000	S	2018	3	0.572806556	13	13	13	13	10	10	30	20	intermix	22.3
051-190-045-000	S	2011	3	0.446634966	44	44	44	44	8	6	55	40	intermix	6.6
051-330-070-000	S	2008	3	0.288889114	46	46	17	17	7	4	20	65	intermix	4.1
053-180-099-000	D	2008	3	0.082906516	3	1	3	1	8	8	30	70	intermix	2.6
051-210-043-000	S	2013	3	0.240626062	123	123	7	7	4	0	5	15	intermix	7.8
053-260-099-000	D	2009	3	0.204036827	30	21	8	8	7	6	25	55	intermix	3.8
050-100-137-000	D	2010	3	0.079198705	27	8	27	8	7	6	70	70	intermix	18.6
053-170-025-000	D	2016	3	0.123448401	7	7	7	7	10	9	30	35	intermix	5.9
052-090-021-000	D	2015	3	0.045399029	1	1	1	1	25	16	30	40	intermix	5.9
054-040-045-000	S	2014	3	0.261896398	14	14	14	14	6	5	65	65	interface	5.9
053-180-166-000	D	2016	3	0.236861999	10	10	10	10	10	9	15	45	intermix	3.2
055-090-050-000	S	2009	3	0.260233509	33	10	13	10	5	3	15	10	intermix	6.5
051-083-078-000	S	2012	3	0.19198624	19	19	19	19	13	11	70	60	intermix	4.6
051-210-042-000	S	2015	3	0.250669365	92	92	7	7	5	0	0	15	intermix	7.4
055-190-068-000	S	2018	3	2.412081748	98	98	98	98	0	0	25	35	intermix	11.7
054-202-051-000	S	2009	3	0.390110482	27	27	27	27	4	2	45	70	intermix	16.5
050-090-055-000	D	2010	3	0.202380817	11	11	11	11	13	12	20	50	intermix	10.2
055-440-126-000	D	2014	3	0.153524079	8	8	8	8	7	6	50	65	interface	8.2
052-340-011-000	S	2008	3	0.353551599	31	9	24	9	13	11	20	50	intermix	3.8
051-330-072-000	S	2015	3	0.885613517	42	42	34	34	6	3	20	35	intermix	5.2
055-080-050-000	S	2016	3	0.412270741	46	46	39	39	7	4	5	10	intermix	7.1
051-104-169-000	D	2008	3	0.183794415	23	5	11	5	8	5	45	50	interface	10.2
055-190-065-000	S	2017	3	1.39372238	74	74	74	74	1	1	20	25	intermix	14.1
050-350-003-000	D	2016	3	0.30902671	18	16	18	16	12	11	30	35	interface	3.7
055-220-045-000	D	2009	3	0.466792796	19	19	19	19	8	8	30	30	intermix	10
053-230-129-000	D	2015	3	0.139406313	17	10	17	10	10	8	60	55	interface	1.2
052-070-039-000	S	2012	3	0.10155605	19	19	19	2	13	11	30	45	intermix	3.6
053-021-007-000	S	2018	3	0.248717523	17	17	17	17	13	13	25	70	intermix	5.1
052-182-004-000	D	2012	3	0.16020518	13	8	13	8	8	8	35	30	intermix	11.2
055-530-007-000	S	2015	3	1.710101578	34	34	12	12	5	1	15	45	intermix	12.6
053-210-021-000	D	2011	3	0.169787535	27	6	12	6	13	10	20	55	intermix	4.1
055-232-004-000	D	2015	3	1.261812222	12	12	12	12	6	6	70	75	intermix	6.9
050-030-011-000	S	2008	3	5.251749089	59	59	59	59	2	2	35	80	intermix	15.3
052-237-019-000	D	2008	3	0.074476325	7	7	7	7	27	27	70	70	intermix	6.4
051-250-137-000	D	2018	3	0.324949413	18	18	18	18	6	6	25	50	intermix	8.2
053-200-017-000	D	2010	3	0.145050587	6	6	6	6	16	16	20	65	intermix	4.3
051-050-064-000	D	2009	3	1.374591663	32	32	32	32	6	6	45	55	intermix	16.8
050-240-083-000	D	2016	3	0.297626062	20	20	20	20	6	5	30	45	intermix	11.6
051-480-041-000	S	2018	3	0.229756374	87	87	8	8	6	0	25	30	intermix	0.2
051-300-010-000	D	2017	3	0.132411574	8	8	8	8	10	10	50	65	intermix	7.3
053-240-012-000	D	2013	3	0.785888709	24	24	24	24	3	3	25	45	intermix	5.3
050-200-076-000	S	2008	3	0.191756374	21	21	21	21	16	13	35	40	interface	1.7
054-202-049-000	D	2017	3	0.207180898	10	10	10	10	5	1	45	55	intermix	15.6
054-152-094-000	S	2008	3	0.202634156	7	7	7	7	12	11	25	40	intermix	3.7
051-480-029-000	D	2008	3	0.288942533	54	54	7	7	7	3	35	30	intermix	6.1
054-171-082-000	D	2017	3	0.327713881	15	15	15	15	8	8	35	50	intermix	3.3
054-201-052-000	D	2015	3	1.027043302	13	13	13	13	11	11	10	35	intermix	7.3
051-240-020-000	S	2015	3	0.594365439	32	27	32	27	9	7	15	35	interface	10.5
054-163-037-000	D	2008	3	0.106870902	6	6	6	6	13	11	20	55	intermix	14.8
051-480-044-000	S	2017	3	0.738832456	62	62	46	46	5	1	20	20	intermix	10.4
051-220-093-000	D	2018	3	0.245439093	22	22	22	22	5	5	10	60	intermix	7.6
053-240-081-000	D	2008	3	0.416813841	62	62	62	62	2	2	30	75	intermix	10.3
055-180-024-000	S	2011	3	2.618490894	115	58	28	3	3	0	35	40	intermix	6.6
053-260-101-000	D	2009	3	0.261997572	39	39	8	8	8	5	15	50	intermix	1.7
050-040-015-000	S	2010	3	0.366801295	37	37	15	15	9	4	35	55	intermix	8.6
052-236-004-000	D	2015	3	0.069100364	6	6	6	6	23	23	45	45	interface	7
051-210-046-000	S	2008	3	2.465330231	233	233	66	66	0	0	5	15	intermix	22.8
051-210-041-000	S	2009	3	0.233783488	60	60	9	9	7	1	5	15	intermix	6.2
055-261-088-000	D	2016	3	0.228923917	9	9	9	9	11	9	20	40	intermix	10.9
050-060-071-000	D	2009	3	0.150323756	4	4	4	4	8	6	30	45	intermix	1.4
051-480-037-000	D	2017	3	0.23111291	42	42	5	5	6	3	45	40	intermix	4.9
051-480-039-000	S	2013	3	0.275360987	50	50	5	5	7	3	15	45	intermix	7
054-040-046-000	D	2014	3	0.1531121	14	14	14	14	6	5	60	70	interface	5.2
051-480-025-000	S	2008	3	0.210888709	53	53	37	37	7	3	55	35	intermix	11.1
055-170-035-000	S	2014	3	1.384952246	196	196	56	43	3	0	15	40	intermix	4.3
051-040-052-000	S	2016	3	0.688335087	21	15	21	15	8	7	40	70	intermix	20
050-450-024-000	D	2014	3	0.245978551	32	32	32	32	9	8	25	45	intermix	7.4
050-052-076-000	D	2009	3	0.136628895	4	4	4	4	11	11	50	35	intermix	7.2
055-080-051-000	S	2014	3	0.404252125	36	36	36	36	9	8	10	15	intermix	6.3
050-210-050-000	D	2004	2	0.222040065	19	19	19	19	8	7	60	70	intermix	5.8
054-220-075-000	D	2002	2	0.192707001	8	8	8	8	6	6	45	60	intermix	3.1
054-120-051-000	D	2007	2	0.192202752	34	34	34	34	4	4	65	70	intermix	14
054-142-097-000	D	2000	2	0.25846378	23	23	23	23	9	9	50	75	intermix	9.5
053-260-083-000	D	1998	2	0.196148523	3	3	3	3	10	4	45	40	intermix	5.5
050-250-038-000	D	2003	2	0.332533792	36	13	36	13	10	8	45	55	intermix	4.2
055-530-041-000	S	2003	2	0.20353622	20	20	20	20	9	5	15	30	intermix	7.4
055-090-062-000	S	2000	2	2.413364225	82	82	38	14	1	0	10	20	intermix	8.5
052-290-033-000	S	2005	2	1.775906111	68	60	68	60	3	3	25	35	intermix	2.1
052-350-045-000	D	2004	2	0.160679482	16	16	16	16	13	12	50	40	intermix	5.1
054-191-034-000	D	2007	2	0.112535006	28	1	28	1	12	11	45	55	interface	5.1
051-460-021-000	S	2006	2	1.444176042	37	3	32	3	4	2	10	15	intermix	12.7
051-460-022-000	S	2004	2	0.915690004	64	64	22	22	4	2	10	15	intermix	13.5
051-104-164-000	D	2007	2	2.528429381	63	8	37	8	4	3	65	75	intermix	29.9
051-330-045-000	S	2007	2	0.306167948	47	47	47	47	4	2	40	55	interface	8.4
051-120-050-000	D	1998	2	0.417214083	12	12	12	12	6	6	75	85	intermix	25.1
053-150-190-000	S	1997	2	0.198230271	21	5	21	5	13	9	30	35	intermix	0.9
055-111-037-000	D	2005	2	0.985511938	33	33	33	33	2	2	50	60	intermix	5.9
050-230-080-000	S	2003	2	0.277585188	49	49	14	14	5	1	10	25	intermix	3.9
052-012-049-000	D	2003	2	0.515482396	11	11	11	11	10	9	45	70	intermix	3
053-040-041-000	D	1997	2	0.277912991	18	18	18	13	4	4	15	35	interface	5.7
050-330-079-000	D	1998	2	0.148159045	15	6	15	6	16	14	45	45	interface	5.8
050-013-053-000	D	1997	2	0.15164913	7	7	7	7	11	10	35	45	interface	4.8
054-090-036-000	D	2004	2	0.382664104	14	10	14	10	10	10	25	15	intermix	3
054-141-030-000	D	2000	2	0.260201943	18	18	18	18	10	8	70	65	interface	2.2
050-040-125-000	D	2007	2	0.279589235	9	9	9	9	7	6	55	55	intermix	5.9
053-180-153-000	D	1998	2	0.22536463	10	10	10	10	8	7	15	55	intermix	4.2
055-120-076-000	D	2006	2	0.945106435	52	52	32	32	5	4	65	80	intermix	14.1
050-120-167-000	D	1997	2	0.167558883	8	8	8	8	8	8	20	40	intermix	3.5
055-050-091-000	S	2004	2	0.929749899	35	35	35	35	5	5	20	40	intermix	14
053-180-157-000	D	1998	2	0.203991097	10	10	10	10	9	8	25	60	intermix	2.3
053-240-082-000	D	2007	2	0.40700688	33	33	33	33	3	3	45	80	intermix	10.6
053-162-093-000	D	2004	2	0.449325779	20	20	20	20	6	5	40	60	intermix	12.3
051-460-062-000	D	2001	2	0.410766896	8	8	8	8	6	6	10	10	intermix	17.3
050-090-048-000	S	2004	2	0.166749494	18	18	18	18	8	8	15	50	intermix	6.7
053-210-077-000	D	2005	2	0.236977742	6	6	6	6	11	11	75	60	intermix	4.3
051-480-009-000	S	2002	2	0.912523675	69	69	20	20	5	0	10	20	intermix	8.1
050-370-029-000	D	2002	2	0.550187374	34	27	34	27	4	4	50	65	intermix	10.6
053-300-060-000	D	2001	2	0.161869688	4	4	4	4	18	18	45	35	interface	4.7
053-070-053-000	D	2005	2	0.165835289	13	13	7	7	7	7	80	85	intermix	0.3
050-250-079-000	S	1998	2	0.211972885	48	48	6	6	13	3	20	30	intermix	3.5
052-260-124-000	D	2002	2	0.204944152	4	4	4	4	6	5	55	45	interface	3
054-141-031-000	D	1998	2	0.258340753	5	5	5	5	10	10	55	70	interface	0.6
050-290-048-000	S	2000	2	0.342680291	49	49	12	12	11	6	20	35	intermix	7.3
051-104-003-000	S	1997	2	0.261399433	37	37	37	37	5	5	30	75	intermix	17.2
050-250-077-000	D	1997	2	0.202441522	47	47	11	11	10	3	65	45	intermix	4.7
051-172-050-000	D	2007	2	0.081853096	3	3	3	3	12	11	30	80	interface	16.2
051-480-023-000	S	2000	2	0.798972481	99	99	19	19	5	0	30	20	intermix	11.7
050-230-075-000	S	2007	2	0.288019425	44	44	12	12	12	5	10	10	intermix	5.2
050-250-086-000	D	1998	2	0.233536625	62	62	11	11	8	2	25	35	intermix	3
050-230-079-000	S	2000	2	0.176526912	16	16	14	14	8	2	5	20	intermix	3.2
050-200-129-000	D	2000	2	0.135745852	7	7	7	7	14	13	20	15	interface	5.3
053-162-088-000	D	2003	2	0.199934844	26	26	26	26	10	9	50	55	intermix	6.9
050-220-122-000	S	1997	2	0.494291785	36	36	36	36	5	4	85	80	intermix	4.1
051-480-013-000	D	2004	2	0.302065965	30	15	30	15	6	3	25	30	intermix	10.7
050-230-076-000	S	2003	2	0.20490085	37	21	6	6	13	6	5	10	intermix	4.5
051-132-108-000	D	2007	2	0.069375961	16	16	16	16	15	15	65	60	intermix	4.8
055-211-081-000	D	2006	2	0.282343181	9	6	9	6	13	13	40	40	intermix	3.6
055-100-019-000	S	2000	2	1.785348442	156	20	98	20	0	0	20	20	intermix	11.9
055-530-018-000	S	1997	2	0.218779442	31	31	16	16	10	2	15	10	interface	8.8
054-060-117-000	D	2003	2	0.2719138	56	56	14	14	5	2	55	30	intermix	1.6
050-330-073-000	S	1997	2	0.150177256	8	8	8	8	15	15	20	35	interface	4.2
051-460-029-000	D	2002	2	0.264825577	42	42	11	11	5	3	5	10	interface	9.7
055-150-068-000	S	2001	2	0.602870093	32	32	32	32	3	3	20	30	intermix	7.8
054-132-049-000	D	2007	2	0.405692432	30	30	30	30	13	12	40	50	intermix	2.6
050-230-072-000	S	2004	2	0.548276811	7	7	7	7	10	10	20	10	intermix	4.9
051-310-002-000	D	1998	2	0.108005666	4	4	4	4	14	14	40	40	interface	7.6
053-162-092-000	D	2003	2	0.445410765	21	21	11	11	5	4	30	65	intermix	8.1
050-040-142-000	D	2004	2	0.18654917	12	7	12	4	14	9	15	45	intermix	6.1
052-182-084-000	D	2006	2	0.077994334	12	12	12	12	19	19	75	75	intermix	7.8
050-250-082-000	D	2000	2	0.202436261	47	47	6	6	11	5	30	30	intermix	5.5
050-250-080-000	S	2000	2	0.211995953	32	32	9	9	11	4	50	30	intermix	1.9
055-420-008-000	D	2001	2	0.857916228	15	15	15	15	7	6	20	35	intermix	7.4
055-330-001-000	D	1999	2	0.262764468	28	28	28	28	6	5	50	55	intermix	12.5
054-010-118-000	D	2004	2	0.83404654	22	22	22	22	4	3	55	60	intermix	12.6
053-250-122-000	S	2007	2	0.296263861	7	7	7	7	11	9	20	45	intermix	1.4
051-460-034-000	S	2004	2	0.247117361	82	2	79	2	1	0	10	15	intermix	12.6
051-040-080-000	D	2003	2	0.191621206	6	6	6	6	12	12	25	75	interface	6
051-280-006-000	S	2007	2	0.147962768	8	8	8	8	13	13	85	75	intermix	8.7
051-120-133-000	S	2007	2	0.898594496	29	29	29	29	6	5	50	80	intermix	22.1
051-104-159-000	D	2002	2	0.162782679	8	8	8	8	12	10	30	55	intermix	7.5
051-330-057-000	S	2001	2	0.277422906	25	25	25	25	7	4	55	45	intermix	9.7
055-530-020-000	S	2000	2	0.211467827	27	27	20	20	9	4	40	35	interface	8.3
051-072-028-000	D	1999	2	1.69992756	137	137	33	33	1	0	10	35	intermix	18.5
051-330-053-000	D	1999	2	0.290056657	42	42	15	14	12	5	75	40	interface	3.9
055-070-007-000	D	1999	2	0.298352084	14	14	14	14	10	7	20	50	intermix	9.2
053-170-195-000	S	2004	2	0.188248887	34	34	9	9	11	8	25	50	intermix	2.6
053-180-152-000	D	1997	2	0.292985431	23	23	23	23	10	9	65	55	intermix	6.6
051-460-012-000	D	2004	2	0.267913395	42	42	16	16	3	2	5	15	intermix	5.9
055-530-030-000	S	2000	2	0.20401295	14	14	14	14	10	6	30	40	interface	7.5
051-330-009-000	D	2001	2	0.144039255	17	17	17	17	10	2	70	45	interface	2.7
051-480-016-000	S	2000	2	0.298366653	66	66	15	15	10	1	10	15	intermix	8.1
054-250-005-000	D	2003	2	0.716125051	12	12	12	12	8	8	70	75	intermix	22.1
055-261-027-000	D	2001	2	0.186200324	6	6	6	6	14	13	25	45	intermix	2.9
053-021-097-000	D	1997	2	0.312405909	15	15	15	15	10	9	25	45	intermix	2.4
055-190-043-000	S	2005	2	2.015728045	47	47	47	47	1	1	15	15	intermix	4.4
055-120-106-000	S	2000	2	0.681793201	57	46	44	44	2	1	10	20	intermix	5.3
055-270-079-000	D	2005	2	0.203737353	18	11	18	11	11	11	25	35	intermix	4.5
051-050-120-000	D	1997	2	0.170684743	10	10	10	10	12	11	70	65	intermix	5.3
050-250-094-000	S	2006	2	1.367762444	43	43	43	43	1	1	20	50	intermix	5.3
051-380-034-000	D	1976	1	0.1273448	16	5	16	5	9	9	20	60	intermix	6.6
053-132-012-000	D	1959	1	0.479085795	19	19	7	7	8	6	55	40	interface	3.1
051-320-024-000	D	1964	1	0.188958721	33	33	7	7	14	9	30	45	intermix	2.4
054-131-004-000	D	1945	1	0.203603804	7	7	7	7	8	8	20	50	interface	7.8
050-440-002-000	D	1986	1	0.164078511	4	4	4	4	12	10	30	30	interface	2.4
055-030-053-000	D	1991	1	1.28776123	24	24	24	24	5	4	35	35	intermix	8.2
051-260-004-000	D	1956	1	0.131055443	46	46	18	7	6	4	35	30	intermix	2.7
050-420-029-000	S	1986	1	0.183265884	46	23	8	8	13	6	25	35	interface	3.9
051-330-031-000	D	1989	1	0.32354917	11	11	11	11	6	4	25	45	intermix	15.7
053-300-002-000	D	1977	1	0.138512748	7	7	7	7	16	16	60	55	interface	6.5
051-083-091-000	D	1989	1	0.140734116	6	6	6	6	9	7	80	50	intermix	3.5
055-280-002-000	D	1960	1	0.651745042	10	10	10	10	9	9	35	15	intermix	11.7
052-011-107-000	D	1994	1	0.223550384	18	13	18	13	8	8	25	85	intermix	2.2
051-230-029-000	D	1953	1	0.135385674	8	8	8	6	15	9	60	30	interface	5.7
051-161-024-000	D	1987	1	0.152374342	19	19	19	19	9	9	65	55	intermix	4.1
051-083-119-000	D	1970	1	0.148864427	14	14	14	14	9	9	30	65	intermix	12.2
054-260-021-000	D	1956	1	0.147812222	3	3	3	3	14	13	20	35	interface	2.5
052-031-088-000	D	1973	1	0.16469486	13	13	13	13	11	8	35	55	intermix	8
054-171-117-000	D	1978	1	0.110987859	12	12	12	12	11	11	80	60	intermix	16.1
054-080-034-000	D	1988	1	0.533207608	33	16	33	16	3	3	85	80	intermix	14.9
050-171-003-000	D	1950	1	0.275873331	13	4	13	4	10	7	30	35	interface	2.4
053-210-064-000	D	1948	1	0.189142452	15	15	15	15	8	8	75	60	intermix	8.4
054-030-014-000	D	1957	1	0.101751113	12	12	12	12	17	14	20	30	interface	4.8
051-310-031-000	D	1963	1	0.096430595	3	3	3	3	15	15	10	35	interface	4.7
051-151-002-000	D	1975	1	0.367688385	15	11	15	11	11	10	65	85	intermix	15.9
055-140-063-000	D	1966	1	3.102493727	119	5	119	5	0	0	55	25	intermix	2.7
055-130-128-000	S	1982	1	0.157932821	8	8	8	8	9	8	30	20	intermix	5.1
051-151-015-000	D	1958	1	0.410984622	11	11	11	11	4	4	70	75	intermix	2.1
055-090-037-000	D	1976	1	0.117843383	18	8	7	7	7	6	20	10	intermix	2.9
051-050-008-000	D	1989	1	0.583795225	4	4	4	4	6	6	20	40	intermix	20.3
054-192-020-000	D	1949	1	0.050186564	9	9	9	9	18	17	50	45	intermix	5.7
050-380-017-000	D	1977	1	0.144897612	8	8	8	8	8	7	45	50	intermix	2.8
052-032-038-000	D	1944	1	0.121365844	8	8	8	8	15	11	90	80	intermix	6.5
050-200-152-000	D	1961	1	0.116902469	7	5	7	5	14	10	35	15	interface	5.3
053-300-047-000	D	1960	1	0.135255767	10	10	10	10	17	15	70	45	interface	4.2
052-024-049-000	D	1964	1	0.102038851	7	2	7	2	16	16	55	70	intermix	7.9
050-280-027-000	D	1962	1	0.097508296	5	5	5	5	18	15	30	25	interface	3.2
051-104-070-000	D	1976	1	0.148619587	20	20	20	20	14	13	30	45	intermix	5.8
051-250-132-000	D	1990	1	0.195346823	4	4	4	4	12	12	20	35	interface	8.6
054-240-135-000	D	1983	1	0.270514771	10	10	10	10	13	9	55	60	intermix	6.9
055-211-033-000	D	1961	1	0.16298624	14	14	14	14	14	14	35	60	intermix	6.1
050-082-093-000	D	1980	1	0.423031566	46	8	42	8	5	4	25	40	interface	7.7
051-104-162-000	D	1949	1	0.269605828	13	11	13	11	16	16	75	35	intermix	6.2
054-131-005-000	D	1920	1	0.238113314	7	7	7	7	7	7	60	75	interface	7.3
052-150-006-000	D	1953	1	0.078965601	8	8	8	8	16	12	60	30	interface	4.3
051-050-003-000	D	1994	1	1.912590854	34	34	34	34	2	2	45	50	intermix	10.3
055-261-059-000	D	1981	1	0.543033185	17	17	17	17	8	8	55	60	intermix	13.6
053-011-111-000	S	1991	1	0.406667341	23	23	23	8	3	1	25	45	intermix	2.8
055-030-015-000	S	1950	1	0.438899231	42	6	42	6	8	8	65	30	intermix	6.6
050-420-019-000	D	1987	1	0.144497369	16	16	10	10	15	8	35	20	interface	6.8
055-020-119-000	D	1991	1	0.843674626	13	13	13	13	5	4	75	45	interface	3.9
051-163-035-000	D	1940	1	0.261204371	5	5	5	5	11	11	55	55	intermix	5.5
053-210-065-000	D	1964	1	0.255456091	17	17	17	17	9	8	70	80	intermix	7.9
055-440-103-000	D	1990	1	0.153734116	4	4	4	4	12	11	55	30	interface	4.9
052-024-124-000	D	1994	1	0.205660057	26	4	26	4	10	10	55	80	intermix	1.5
050-280-022-000	D	1962	1	0.116278025	4	4	4	4	16	12	20	20	interface	4.5
052-080-053-000	D	1947	1	0.289588426	33	33	33	33	6	5	65	40	interface	4.8
052-031-013-000	D	1950	1	0.228338729	2	2	2	2	12	9	40	75	intermix	5.6
051-310-037-000	D	1989	1	0.257919061	21	21	21	21	13	12	45	15	interface	7.1
055-020-115-000	D	1989	1	0.461538244	27	27	27	27	9	9	30	50	interface	6.6
054-171-043-000	D	1964	1	0.111424524	7	7	7	7	11	11	75	65	intermix	14.1
051-330-014-000	D	1972	1	0.124249696	7	7	7	7	13	3	35	25	intermix	4
051-190-095-000	D	1970	1	0.314338729	29	29	29	29	9	8	55	35	intermix	5.2
051-250-092-000	D	1965	1	0.337563335	24	14	24	14	10	9	40	30	intermix	3.8
051-071-104-000	D	1986	1	0.228588426	4	4	4	4	9	9	60	55	intermix	5.3
053-272-055-000	D	1962	1	0.177457305	13	13	13	13	8	7	60	80	intermix	10
050-250-092-000	D	1955	1	0.144925132	6	6	6	6	13	13	40	45	intermix	3.9
053-103-027-000	S	1949	1	0.510585188	27	2	27	2	8	8	35	40	interface	2.4
051-082-055-000	D	1986	1	0.203875354	15	15	15	15	16	16	55	80	intermix	3.6
050-290-033-000	D	1962	1	0.180976528	3	3	3	3	17	15	50	40	intermix	6.2
055-050-041-000	D	1960	1	0.184216107	24	6	24	6	14	13	40	15	intermix	7.4
054-240-113-000	D	1975	1	0.113235532	3	3	3	3	16	15	30	40	intermix	7.1
055-211-030-000	D	1962	1	0.205349656	8	6	8	6	12	12	65	70	intermix	4.1
051-151-044-000	S	1950	1	0.393743424	10	10	10	10	10	9	75	75	intermix	11.8
053-300-064-000	D	1996	1	0.193628895	10	10	10	10	14	14	20	45	interface	6.6
052-130-007-000	D	1956	1	0.146314448	17	6	17	6	19	17	80	55	interface	9.8
050-013-061-000	D	1991	1	0.178558074	9	9	9	9	11	11	20	50	interface	8.2
050-180-013-000	D	1946	1	2.428208822	63	63	63	63	4	3	75	60	intermix	0
053-300-012-000	D	1960	1	0.134349656	6	6	6	6	17	15	45	65	interface	6.4
051-180-095-000	D	1966	1	0.182841764	44	8	44	8	11	7	80	70	intermix	3.9
054-210-067-000	S	1968	1	0.098730069	10	10	10	10	10	8	75	80	intermix	4.5
053-110-012-000	D	1962	1	0.194096722	8	8	8	8	8	6	80	45	intermix	5.7
051-071-089-000	D	1959	1	0.216289357	32	32	32	32	10	10	80	65	intermix	6.2
053-180-137-000	D	1943	1	0.246902873	10	2	10	2	13	13	55	70	intermix	1.7
053-240-024-000	D	1947	1	0.246168353	10	10	10	10	10	10	35	45	intermix	5.7
053-060-045-000	D	1957	1	0.33060259	9	9	9	9	9	7	85	70	intermix	4
051-142-006-000	D	1955	1	0.194706192	18	18	18	18	10	7	55	60	interface	8.4
055-530-031-000	S	1996	1	0.207057467	20	20	18	18	8	3	60	25	interface	6.1
051-250-127-000	D	1990	1	0.276212465	20	20	20	20	8	8	40	60	interface	5.8
051-050-104-000	D	1964	1	0.4011121	37	37	37	37	6	6	75	80	intermix	15.8
051-300-017-000	D	1961	1	0.139812222	9	6	9	6	15	11	25	30	interface	5.3
055-440-090-000	D	1989	1	0.276716309	5	5	5	5	8	8	50	55	interface	5.6
053-011-100-000	S	1989	1	0.264359369	19	19	19	19	6	5	75	50	intermix	4.5
051-310-044-000	D	1988	1	0.255184136	22	13	22	13	12	12	20	25	interface	8.5
050-090-052-000	D	1962	1	4.071505868	56	56	56	56	1	1	60	90	intermix	26.5
054-171-086-000	D	1960	1	0.113762444	15	15	15	15	17	16	30	35	intermix	2.1
053-110-086-000	D	1951	1	0.483962363	36	36	36	36	9	9	75	75	intermix	10.6
051-120-075-000	D	1988	1	0.17829826	4	4	4	4	12	12	30	35	interface	5.6
054-141-069-000	D	1972	1	0.187409955	19	19	6	6	13	11	20	40	interface	8.1
052-070-110-000	D	1981	1	0.168845407	10	10	10	10	8	8	15	55	intermix	3.5
050-290-045-000	D	1970	1	0.137933225	12	4	12	4	19	18	50	35	intermix	4.1
052-070-106-000	D	1981	1	0.158179684	8	8	8	8	10	10	15	45	intermix	7.2
051-290-002-000	S	1973	1	0.177369891	22	22	22	22	12	11	75	45	intermix	7.6
055-440-104-000	D	1989	1	0.26109227	6	6	6	6	9	8	70	40	interface	5.2
051-380-001-000	D	1972	1	0.131980979	4	4	4	4	15	12	50	50	interface	5.6
052-050-005-000	D	1987	1	0.177797653	5	5	5	5	29	29	65	35	interface	7.4
051-151-007-000	S	1957	1	0.397135168	24	24	4	4	10	8	75	70	intermix	12.8
051-040-079-000	D	1949	1	0.1587414	6	6	6	6	13	12	40	60	interface	4.4
052-012-005-000	D	1964	1	0.089804937	8	8	8	8	13	13	50	65	intermix	4
052-300-014-000	D	1956	1	0.088756374	6	6	6	6	22	22	80	80	intermix	4.8
054-132-031-000	D	1949	1	0.191110482	14	4	14	4	11	10	45	50	intermix	1.2
052-340-038-000	D	1995	1	0.132618373	13	4	13	4	15	13	60	45	intermix	7.6
055-170-033-000	D	1987	1	1.686456495	70	70	70	70	2	1	25	40	intermix	14.8
053-250-111-000	S	1949	1	0.548040874	25	25	25	2	11	10	30	60	intermix	4.1
050-360-011-000	S	1962	1	0.131352084	28	28	5	5	14	8	35	30	interface	3.5
051-190-055-000	S	1976	1	0.142716714	25	18	7	7	11	9	25	15	interface	5.2
054-182-065-000	D	1977	1	0.212902873	14	6	14	6	15	13	35	35	interface	4
053-230-062-000	D	1978	1	0.144984622	7	7	7	7	14	14	75	50	interface	4.1
054-230-130-000	D	1986	1	0.16930433	5	5	5	5	8	6	55	45	intermix	4
053-050-010-000	D	1950	1	0.137692028	21	8	21	8	12	11	60	70	intermix	4.6
053-104-023-000	D	1949	1	0.225255767	10	10	10	10	11	10	65	35	intermix	4.4
051-330-004-000	D	1987	1	0.142659652	8	8	8	8	13	7	60	70	intermix	6.1
053-330-023-000	D	1954	1	0.168889114	10	10	10	10	14	14	65	55	interface	6.2
050-290-032-000	D	1977	1	0.129002833	19	5	19	5	17	11	30	25	intermix	7.4
053-240-015-000	D	1978	1	2.066343181	67	5	67	5	3	3	50	80	intermix	9
054-260-017-000	D	1956	1	0.110958721	17	13	17	13	21	18	35	25	interface	7.3
050-081-040-000	D	1950	1	0.389045326	26	26	26	26	9	9	70	60	intermix	5.2
054-132-092-000	D	1978	1	0.319661271	23	23	23	23	15	15	45	35	intermix	9.1
052-130-029-000	D	1954	1	0.092570214	7	7	7	7	17	16	85	40	interface	7.9
053-162-043-000	D	1940	1	0.087475516	6	6	6	6	22	20	45	45	intermix	2.3
053-190-069-000	D	1968	1	0.124702954	4	4	4	4	17	16	30	35	intermix	5.6
051-072-053-000	D	1948	1	0.200985836	8	8	5	5	16	13	60	50	intermix	4.6
052-242-011-000	D	1960	1	0.201868879	7	7	7	7	9	9	75	45	interface	3.7	Year built = Effective year
052-031-081-000	S	1963	1	0.088293403	11	11	11	8	13	13	55	30	interface	9.9
050-230-014-000	S	1979	1	0.147194658	36	36	6	6	9	7	65	75	intermix	8.6
052-031-105-000	D	1961	1	0.101832861	5	5	5	5	14	14	50	65	intermix	10.7
050-082-065-000	D	1967	1	0.099079725	10	2	10	2	21	20	75	65	interface	1.1
055-330-008-000	D	1989	1	0.115170781	10	10	10	10	11	11	25	75	intermix	8.4
051-050-075-000	D	1963	1	0.237902469	35	35	35	35	11	11	100	80	intermix	7.7
050-082-009-000	D	1960	1	0.683860785	21	4	21	4	20	19	55	50	interface	5.9
051-091-027-000	D	1960	1	0.269076083	38	38	10	10	8	7	75	85	intermix	7.2
055-270-013-000	D	1973	1	0.170094699	7	7	7	7	12	12	60	35	intermix	7.9
052-340-004-000	D	1947	1	0.127877782	29	29	29	29	20	20	80	55	intermix	5.1
050-190-003-000	D	1956	1	0.303944152	19	12	19	12	10	9	60	80	interface	0.3
054-172-037-000	D	1966	1	0.436450425	25	6	25	6	4	4	75	80	intermix	5.5
050-380-002-000	D	1964	1	0.09313193	7	7	7	7	10	8	35	60	intermix	4.9
050-420-024-000	D	1985	1	0.15603966	7	7	7	7	14	11	15	50	interface	6
053-131-057-000	D	1947	1	0.080861594	12	3	12	3	16	15	70	75	intermix	3.2
053-250-116-000	D	1965	1	0.197214893	30	15	30	15	17	17	65	35	interface	3.5
051-083-035-000	D	1962	1	0.178897612	10	10	10	10	18	17	25	75	intermix	2.1
051-040-048-000	D	1988	1	0.188737758	30	29	30	3	10	10	75	80	intermix	9.2
054-192-056-000	D	1958	1	0.157969243	9	9	9	9	15	14	35	40	intermix	3.2
053-080-017-000	S	1982	1	0.099334682	36	36	5	5	13	7	50	35	intermix	5.8
053-330-009-000	D	1952	1	0.290994739	10	2	10	2	38	37	70	20	interface	5.5
052-340-034-000	D	1969	1	0.11103966	11	11	11	5	13	13	75	60	intermix	3.1
050-220-116-000	D	1982	1	0.52696641	41	41	41	39	7	3	85	70	intermix	3.6
053-161-042-000	D	1971	1	0.132717928	8	8	8	8	23	17	15	45	intermix	2.9
053-230-064-000	D	1973	1	0.146187778	17	17	17	17	16	16	65	35	interface	4.1
052-110-021-000	S	1950	1	0.140467422	9	9	9	9	18	16	65	55	intermix	9.9
053-011-080-000	D	1969	1	0.100039255	2	2	2	2	17	13	30	35	intermix	4.1
053-180-033-000	D	1948	1	0.428740186	10	10	10	10	11	11	60	65	intermix	3.6
050-013-059-000	D	1993	1	0.185585188	15	5	15	5	14	13	30	60	interface	9.9
051-145-060-000	D	1990	1	0.166776609	17	14	17	14	16	16	85	70	intermix	7
051-092-047-000	D	1980	1	0.170111696	10	5	10	5	14	14	75	70	intermix	8
051-132-096-000	D	1930	1	0.124184945	8	4	8	3	14	12	80	35	intermix	7.3
050-290-008-000	D	1970	1	0.114700121	16	16	16	16	18	14	55	20	intermix	5.5
053-250-105-000	D	1980	1	0.94072238	55	55	55	55	1	1	90	90	intermix	6.9
052-201-003-000	D	1939	1	0.064824767	33	1	33	1	32	24	25	20	interface	5.6
052-260-103-000	S	1978	1	0.218421692	20	20	20	20	7	7	40	45	interface	7.5
053-011-084-000	D	1957	1	0.179522865	14	9	14	9	12	6	30	40	intermix	4.7
051-145-023-000	D	1948	1	0.130166329	10	10	10	10	14	14	60	55	intermix	2.5
052-242-038-000	D	1947	1	0.076598138	4	4	4	4	13	12	50	65	interface	6.3
050-150-012-000	D	1945	1	0.323587212	42	1	25	1	17	16	40	65	interface	4.3
050-430-017-000	S	1985	1	0.258017807	42	42	15	15	10	6	15	20	intermix	4.8
053-132-035-000	S	1960	1	0.113956698	37	37	10	10	20	13	50	40	interface	3.3
053-050-015-000	D	1950	1	0.315664913	10	4	10	4	11	11	60	60	intermix	6.6
050-280-017-000	D	1961	1	0.197962768	25	25	6	6	19	14	25	20	interface	4.1
054-152-096-000	D	1964	1	0.274563335	17	17	17	17	13	13	80	50	intermix	5.4
054-192-106-000	D	1960	1	0.115939296	7	2	7	2	13	12	70	65	intermix	2
054-142-041-000	D	1963	1	0.140664104	9	8	9	8	15	15	20	40	intermix	6.4
053-190-114-000	D	1957	1	0.14674221	10	10	10	10	17	16	75	65	intermix	3
052-050-056-000	D	1954	1	0.194619183	4	4	4	4	10	10	85	75	intermix	8.9
052-235-005-000	D	1948	1	0.115262242	21	14	21	14	23	23	75	50	intermix	4.2
050-120-096-000	D	1970	1	0.126776609	2	2	2	2	11	9	75	45	intermix	4.4
055-111-008-000	S	1947	1	0.384887495	74	73	36	4	6	3	65	40	intermix	8.7
055-030-041-000	S	1947	1	0.187034399	11	11	11	11	7	5	30	45	intermix	10.4
050-210-051-000	D	1962	1	0.223120599	21	21	21	21	11	8	80	40	intermix	5.3
053-170-160-000	D	1986	1	0.286049373	8	8	8	8	11	11	55	20	interface	4.4
051-072-049-000	D	1971	1	0.169015378	30	30	30	30	6	5	75	65	intermix	6.5
050-100-134-000	D	1977	1	0.113199919	4	4	4	4	18	18	50	60	intermix	6.6
054-171-042-000	D	1992	1	0.111533792	7	7	7	7	11	11	60	80	intermix	12.2
054-161-024-000	D	1970	1	0.155934035	10	10	10	10	11	8	65	65	intermix	2
050-051-004-000	D	1930	1	0.37438365	47	8	47	8	19	19	80	45	intermix	6.5
052-271-020-000	D	1950	1	0.36292756	16	16	16	16	11	11	30	35	intermix	6.3
051-040-043-000	D	1980	1	0.170002023	8	8	8	8	14	12	50	60	interface	14.2
052-032-056-000	D	1989	1	0.165354917	7	7	7	7	13	13	70	70	intermix	3.8
055-220-052-000	D	1930	1	0.330089437	41	41	41	4	7	5	20	20	intermix	7.1
052-193-017-000	D	1966	1	1.065541076	51	18	51	18	11	9	15	55	interface	5.1
051-040-053-000	D	1967	1	0.096815459	4	4	4	4	10	10	60	75	intermix	8
053-300-021-000	D	1966	1	0.099033994	2	2	2	2	20	14	25	25	interface	2.7
